# Supplementary material for: Removal of endocrine disruptor di-(2-ethylhexyl)phthalate by modified polythiophene-coated magnetic nanoparticles: characterization, adsorption isotherm, kinetic study, thermodynamics
Source: Royal Society of Chemistry journal article supplement (doi:10.1039/c6ra04172h), 2016-01-01
Supplement: c6ra04172h1.pdf [file c6ra04172h1.pdf]

**RSC Advances**

**Electronic Supplementary Material**

**Removal of Endocrine Disruptor Di-(2-Ethylhexyl)  
Phthalate by Modified Polythiophene Coated Magnetic  
Nanoparticles: Characterization, Adsorption Isotherm,  
Kinetic Study, Thermodynamics**

Siti Nor Atika Baharin, Norazilawati Muhamad Sarih, Sharifah Mohamad, Syed Shahabuddin,  
Khaulah Che Som

### Preparation of 3-(6-bromohexylthiophene) (S1)

Compound (1) was prepared from 3-bromothiophene according to the procedure reported in [27, 28]. 3-bromothiophene (2 mL, 21.3 mmol) was added to the dry, degassed hexane (50 mL). The reaction was started by cooling the flask to  $-78^{\circ}\text{C}$ . *n*-butyllithium in hexane (2.0 M, 10.16 mL) was injected into the reaction flask using air tight gas syringes and stirred for 10 minutes. THF (5 mL) was injected drop-wise for 15 minutes, and continuously stirred for 1 hour, resulting in a white precipitate and clear supernatant liquid. The supernatant liquid was removed and exchanged with hexane/THF (10:1 v/v, 55 mL). 1,6-dibromohexanes (32.7 mL, 213 mmol) was added and stirred for 2 hours. The reaction was stopped with the addition of saturated  $\text{NaHCO}_3$  (50 mL) and diethyl ether (100 mL) were added to separate the organic and inorganic layers. The organic layer was washed with water (100 mL), brine solution (100 mL), dried with magnesium sulfate anhydrous, treated with decolorizing charcoal, filtered, and concentrated in vacuum to produce orange oil. The excess 1,6-dibromohexane was removed by vacuum distillation (0.04 torr,  $55^{\circ}\text{C}$ ), and purified silica gel column chromatography system (ethyl acetate/hexane, 1/99 to 5/95 v/v) was used to obtain an oily product. Yield: 52%.  $^1\text{H}$  NMR (400 MHz,  $\text{CDCl}_3$ )  $\delta$  (ppm): 1.38-1.46 (4H, m), 1.62 (2H, m), 2.59 (2H, t), 3.35 (2H, t), 6.86 (2H, m), 7.15–7.17 (1H, m). FT-IR ( $\text{cm}^{-1}$ ): 3005.47, 2959.71, 2933.71, 2857.26, 1551.4, 1459.60, 1437.01, 1420, 1246.85, 1216, 1031.13, 859.61, 773.32, 643.35 and 559.77.

### Preparation of 4-((phenylimino)methyl)phenol (S2)

4-hydroxybenzaldehyde (122 mg, 10 mmol) was added to (112 mg, 10 mmol) 2-aminobenzenethiol in 50-mL of ethanol. The mixture was refluxed for 3 hours. Yellow crystal was obtained after recrystallization with ethanol, resulting in a yield of 95%. m.p:  $203.8\text{--}205.5^{\circ}\text{C}$ .  $^1\text{H}$  NMR (400 MHz,  $\text{CDCl}_3$ )  $\delta$  (ppm): 6.7 (2H-Ar), 7.5 (2H-Ar), 7.2 (2H-Ar), 7.8 (H-Ar-S), 8.9 (H-C=N), 9.7 (OH). FT-IR ( $\text{cm}^{-1}$ ): 1609, 1588 & 1504, 749, 3411.

1

2

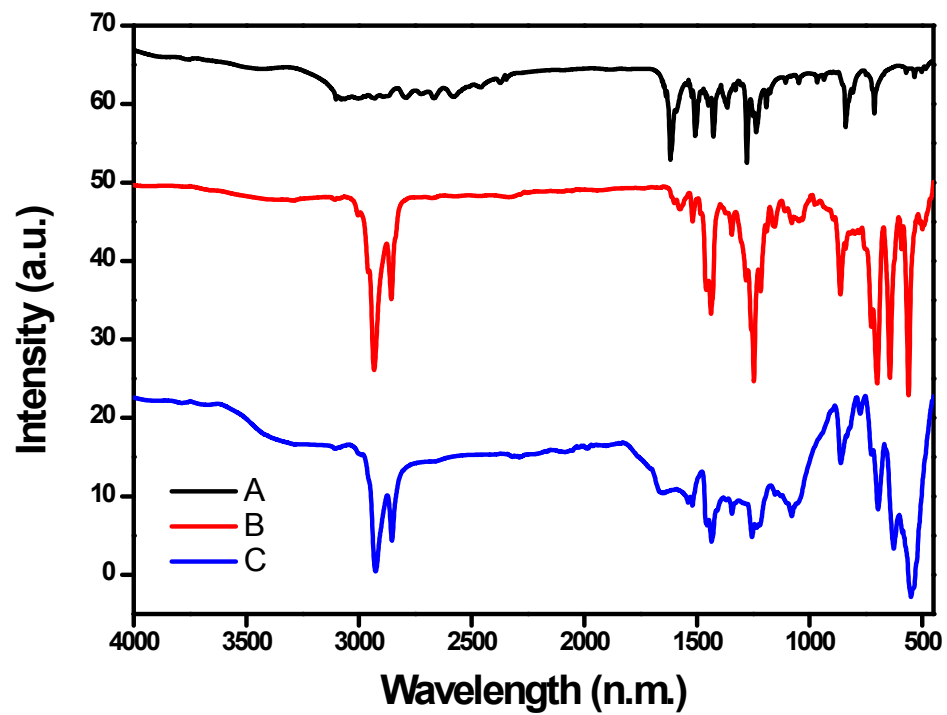

3

4

5

Figure S1: FT-IR for compounds (A) 4-((phenylimino)methyl)phenol, (B) 3-bromohexylthiophene and

6

(C) N-(4-(6-(thiophen-3-yl)hexyloxy)benzylidene)benzenamine.

7

8

9  
10  
11  
12  
13  
14  
15  
16  
17  
18  
19  
20  
21  
22  
23  
24  
25  
26

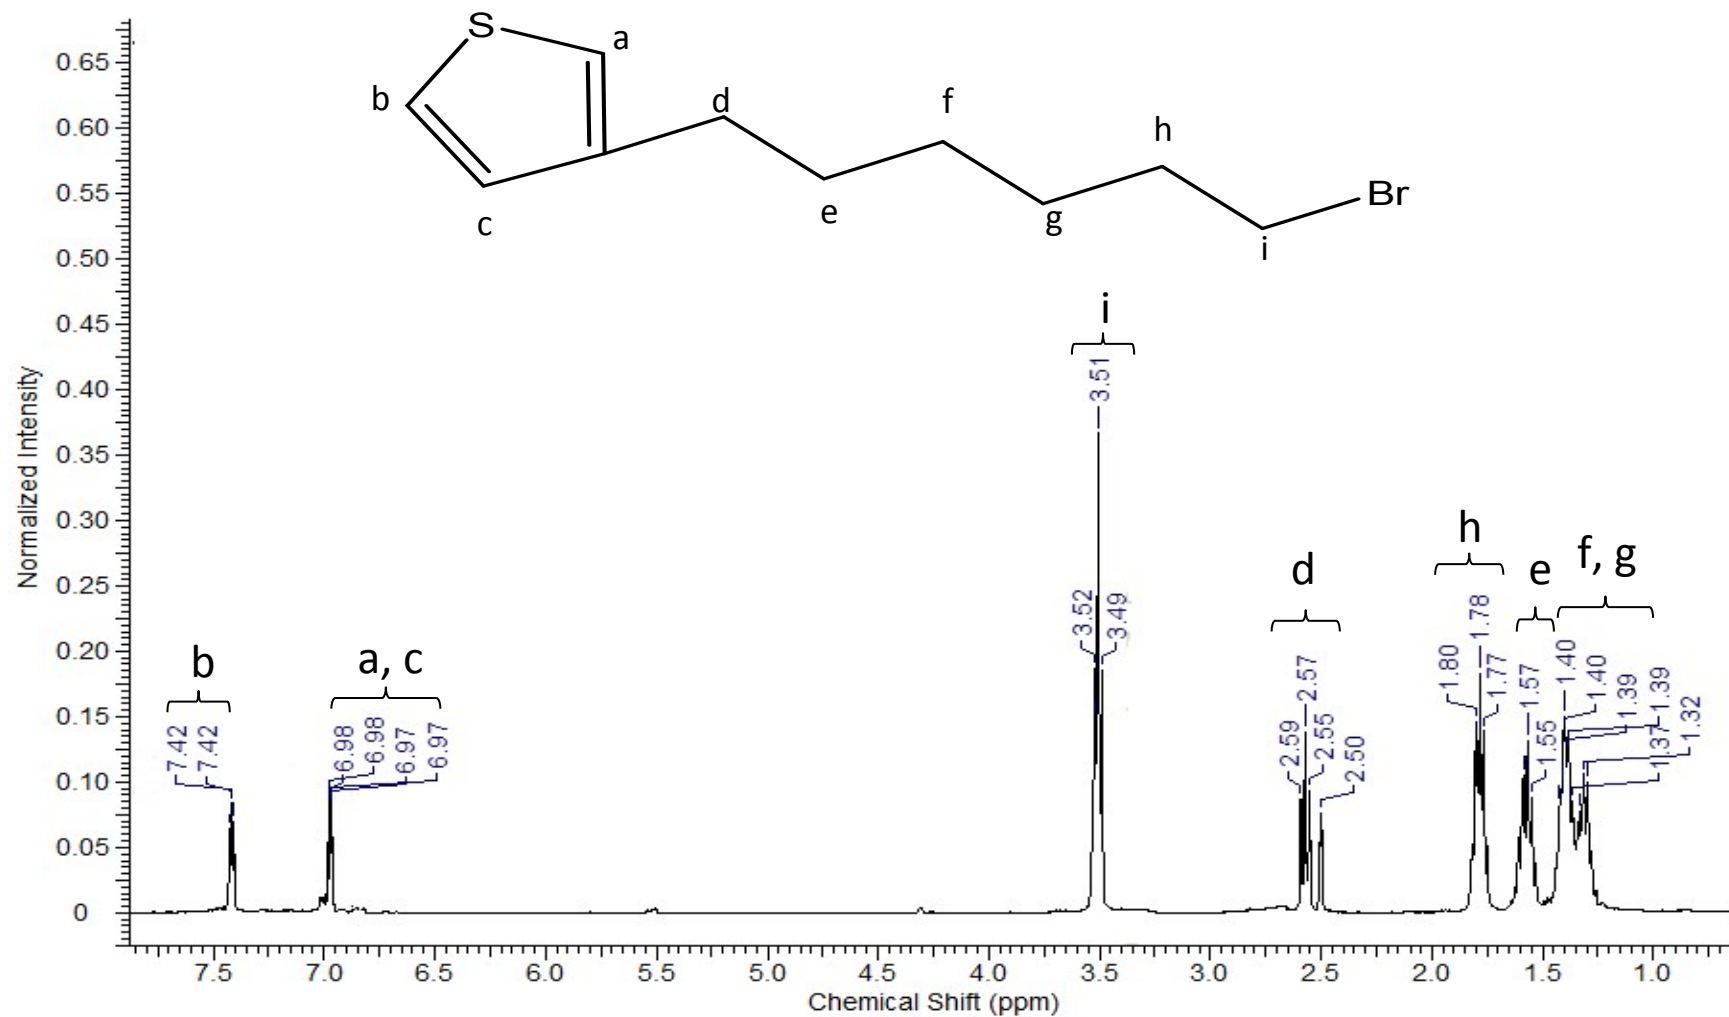

Figure S2: <sup>1</sup>H NMR for 3-bromohexylthiophene (1)

27  
28  
29  
30  
31  
32  
33  
34  
35  
36  
37  
38  
39  
40  
41  
42  
43  
44

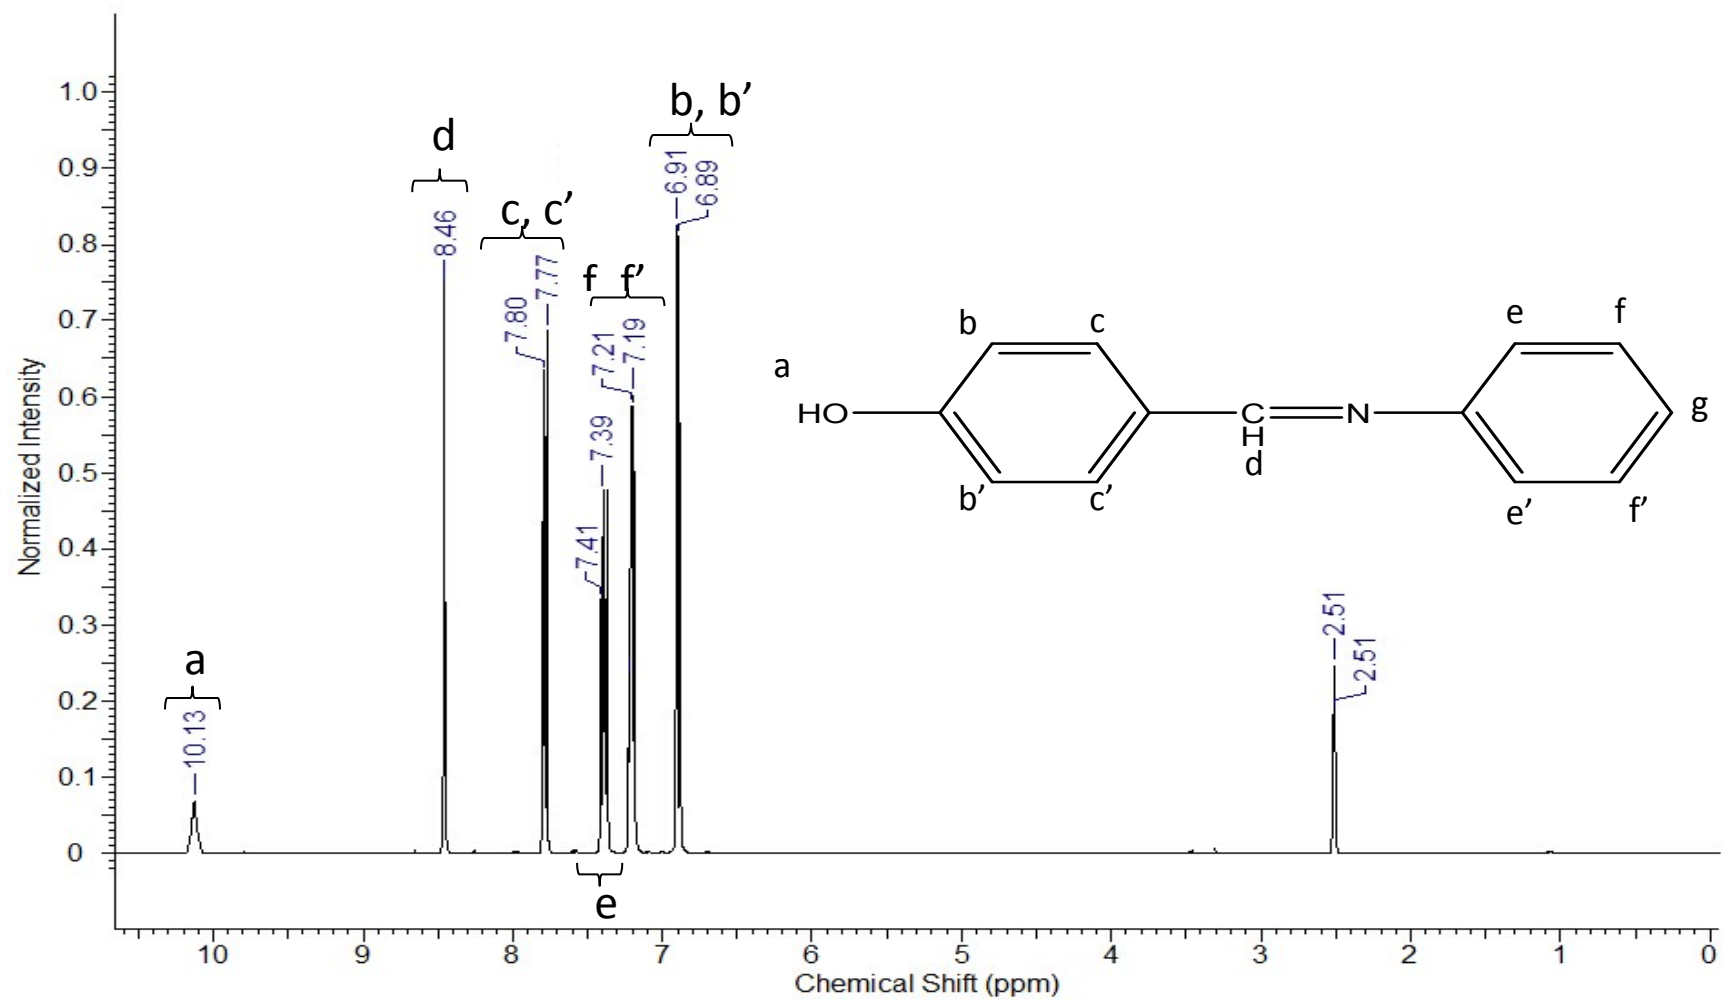

Figure S3: <sup>1</sup>H NMR for 4-((phenylimino)methyl)phenol (2)

45

46

47

48

49

50

51

52

53

54

55

56

57

58

59

60

61

62

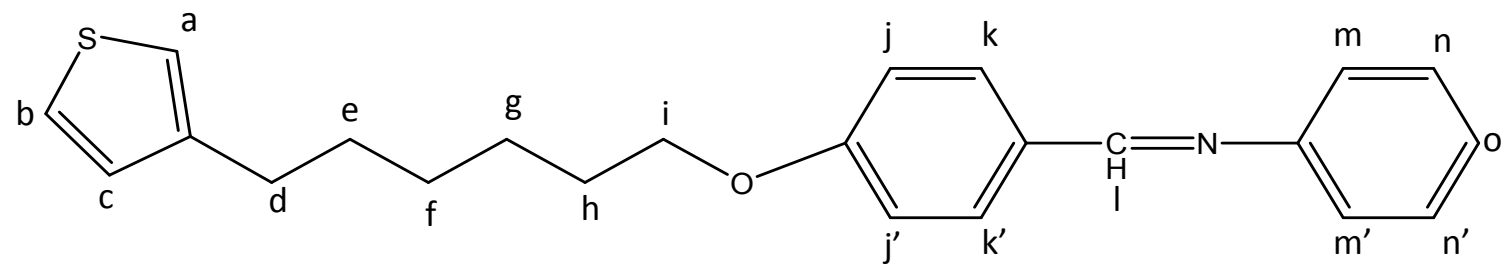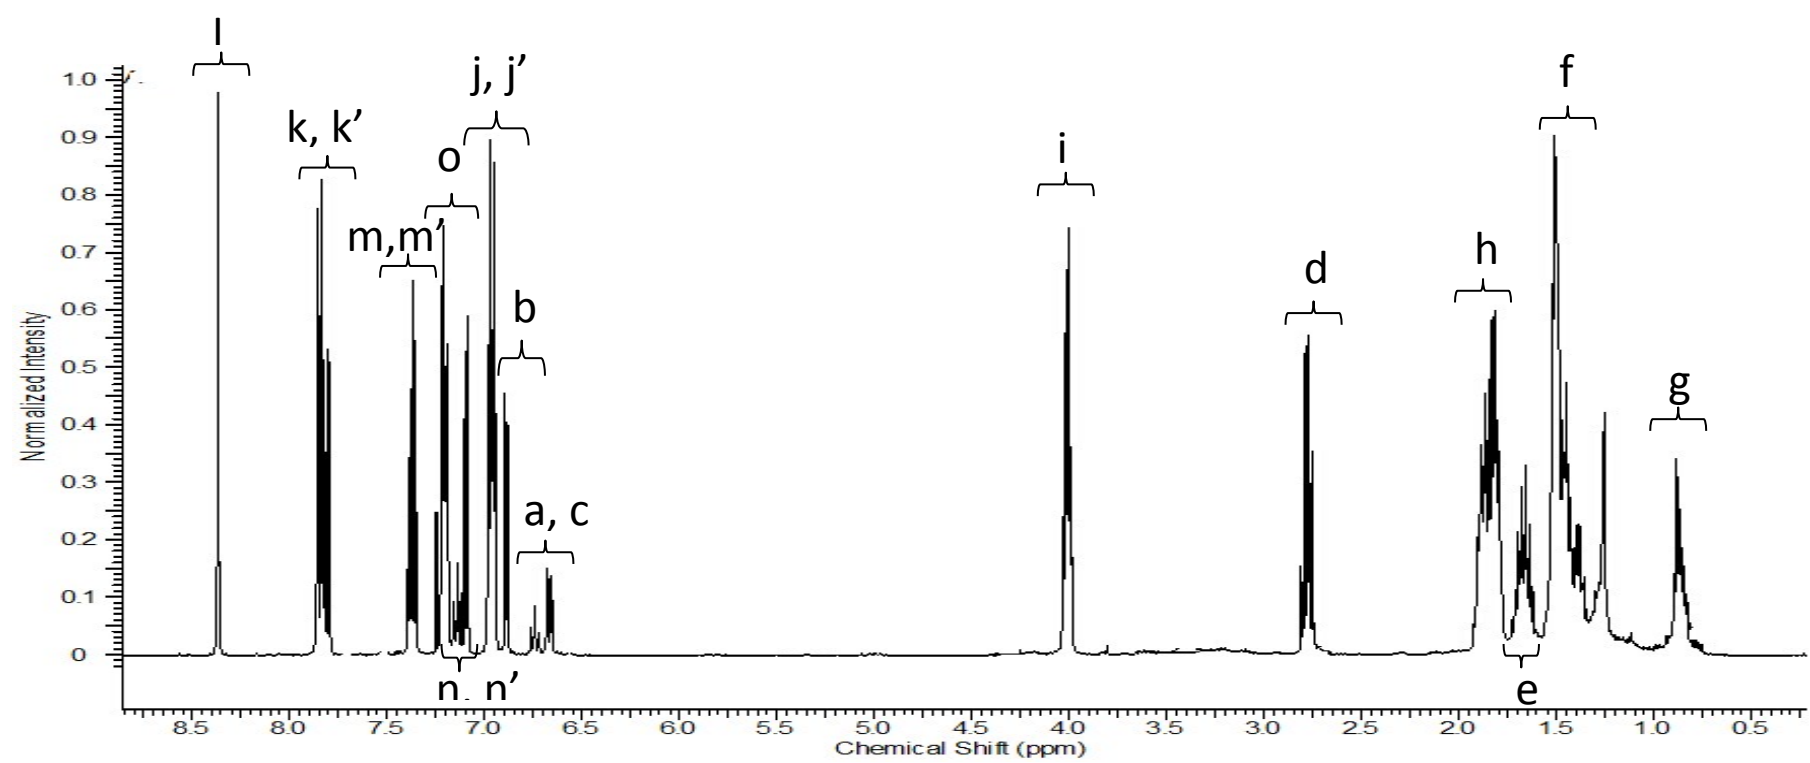

Figure S4: <sup>1</sup>H NMR for N-(4-(6-(thiophen-3-yl)hexyloxy)benzylidene)benzenamine(3)

63

64

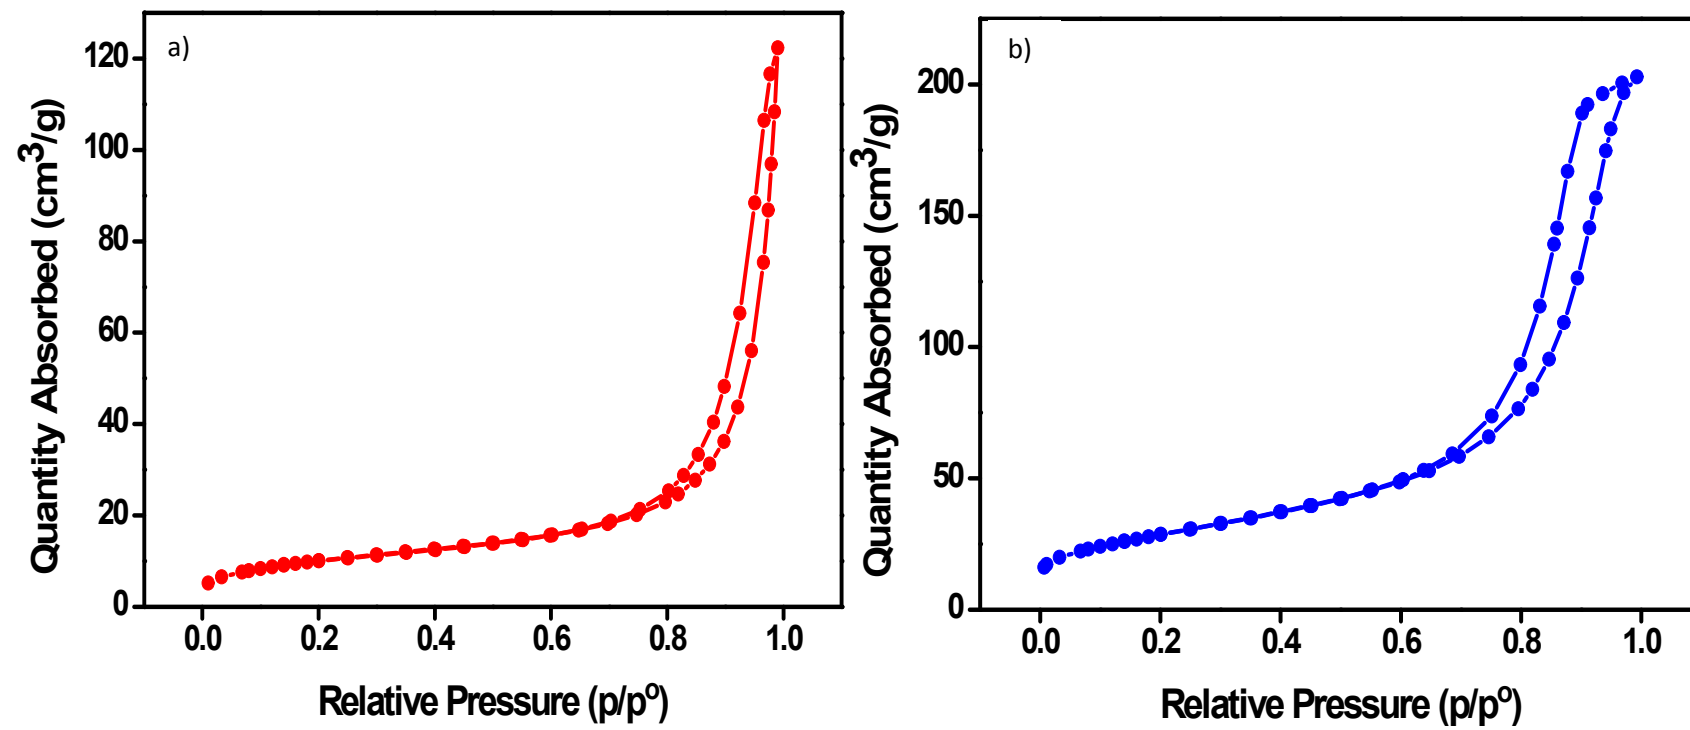

65

66

67

68

69

70

Figure S5: BET profile (a) Fe<sub>3</sub>O<sub>4</sub> and (b) Fe<sub>3</sub>O<sub>4</sub>@P3TArH

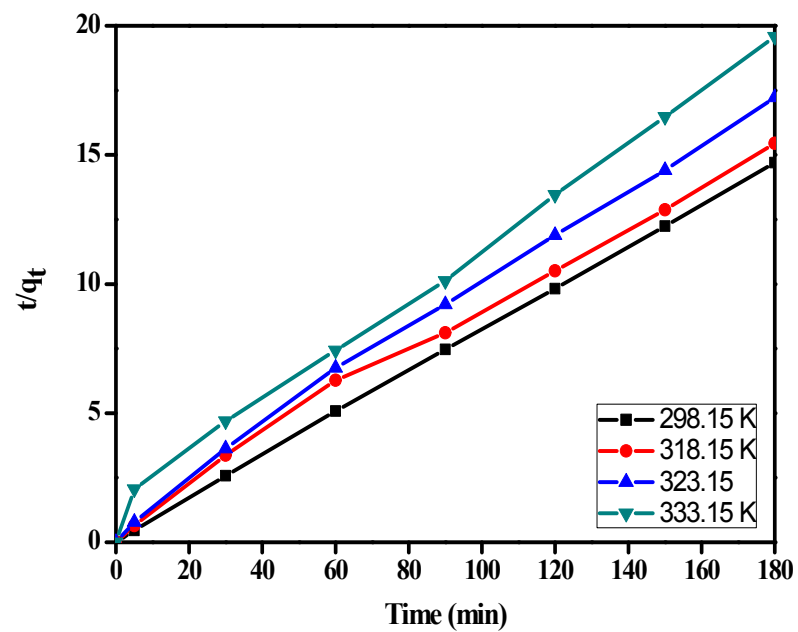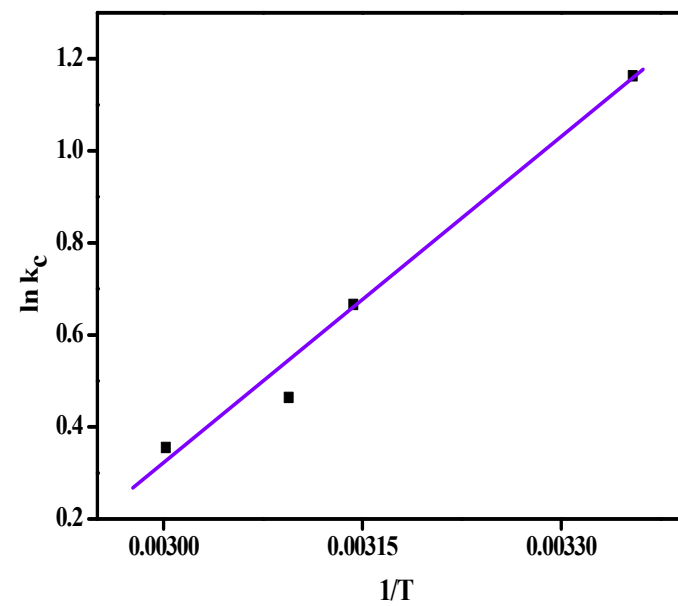

72

73

Figure S6: Pseudo second-order kinetics model

74

75

76

77

78

Figure S7: Van't Hoff function



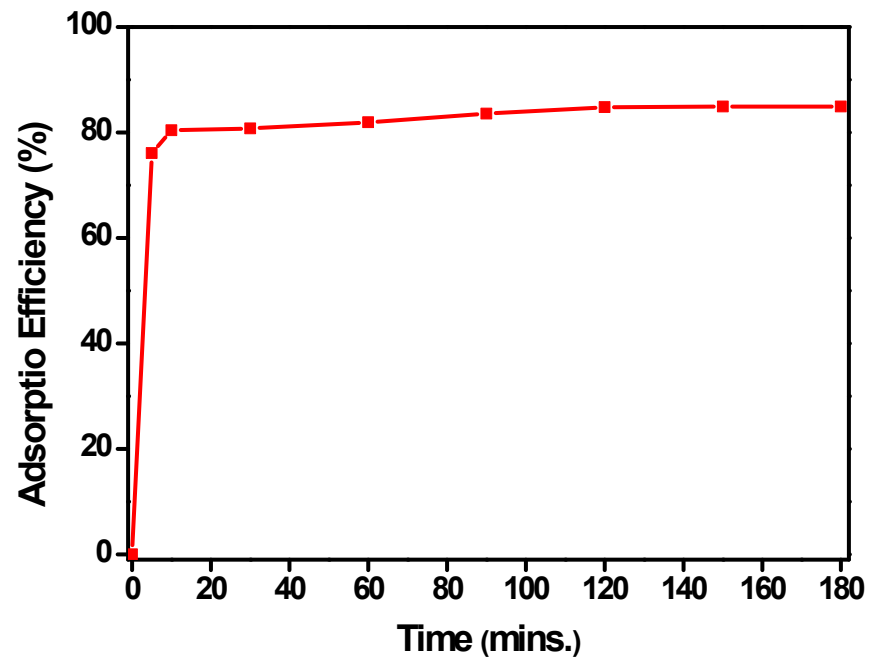

Figure S8: Adsorption Efficiency over time

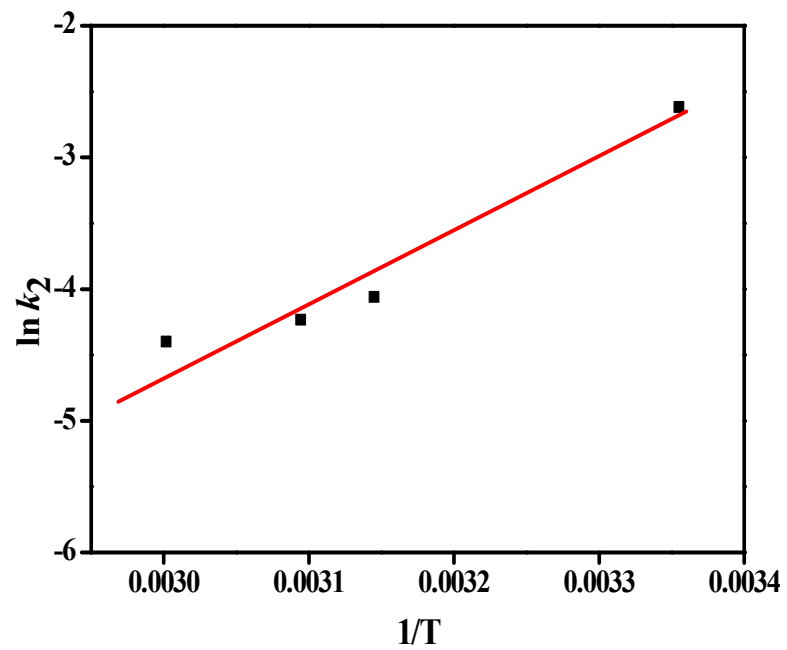

Figure S9: Arrhenius function

79  
80  
81  
82  
83  
84  
85  
86  
87  
88

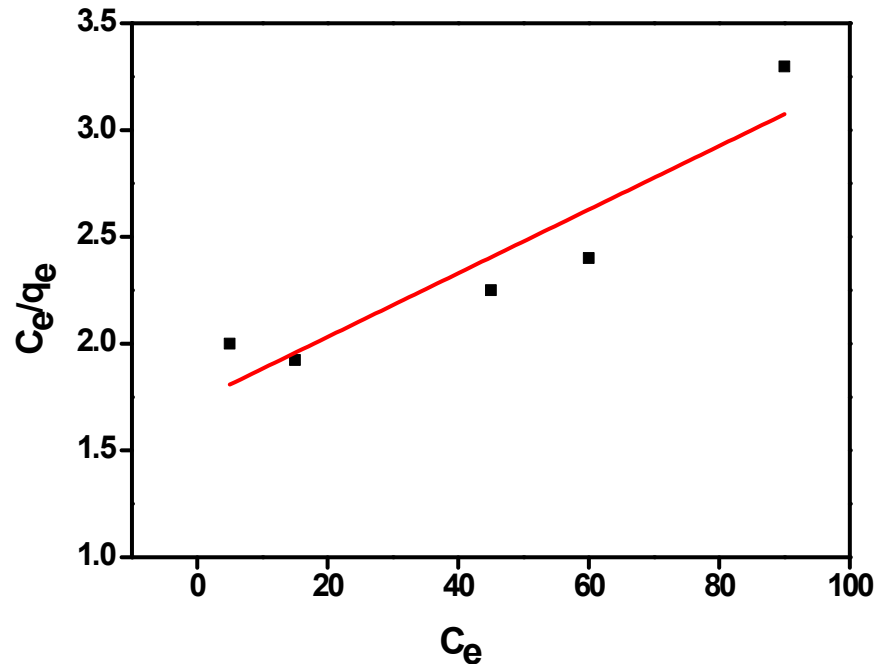

89  
90

91

Figure S10: Langmuir isotherm model

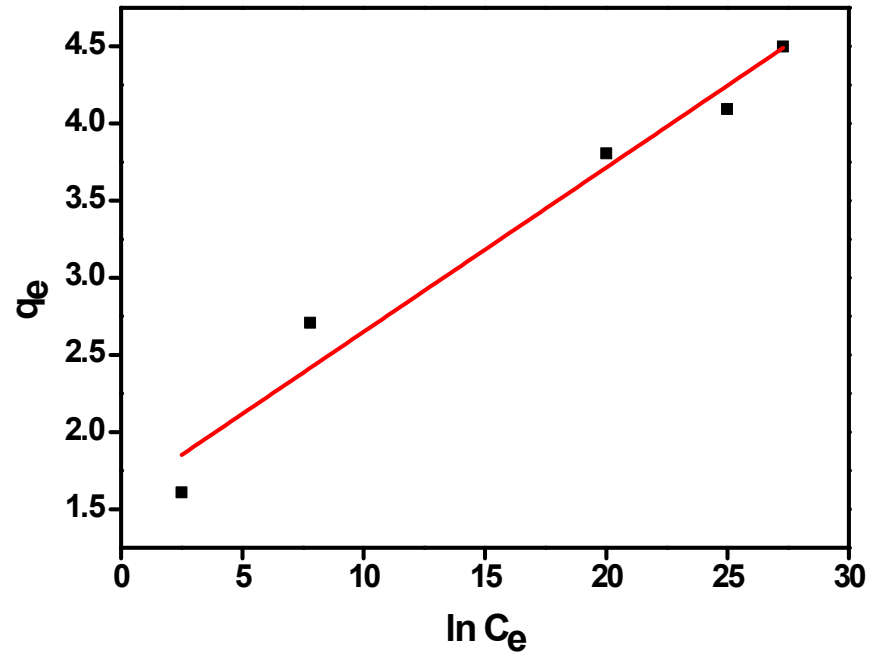

Figure S11: Temkin isotherm model
